# Supplementary material for: TAK1 Inhibitor Enhances the Therapeutic Treatment for Glioblastoma
Source: PubMed Central journal article supplement (PMC7794959; doi:10.3390/cancers13010041), 2020-12-25
Supplement: cancers-13-00041-s001.pdf [file cancers-13-00041-s001.pdf]

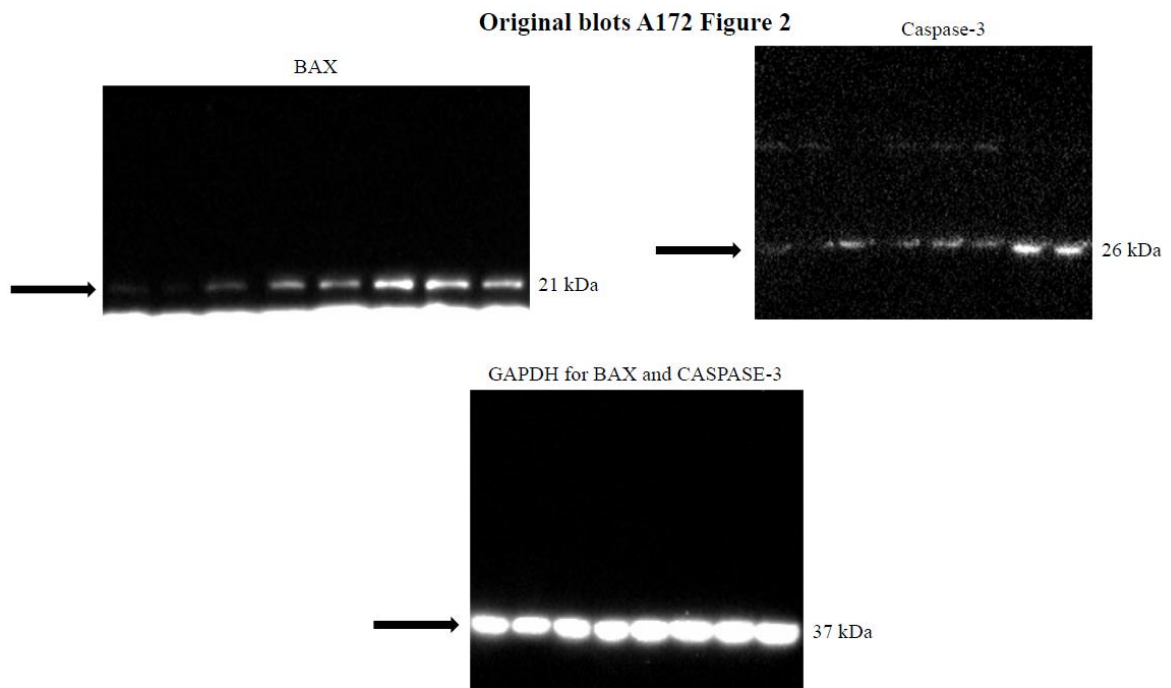

**Figure S1.** Original blots A172 of Figure 2.

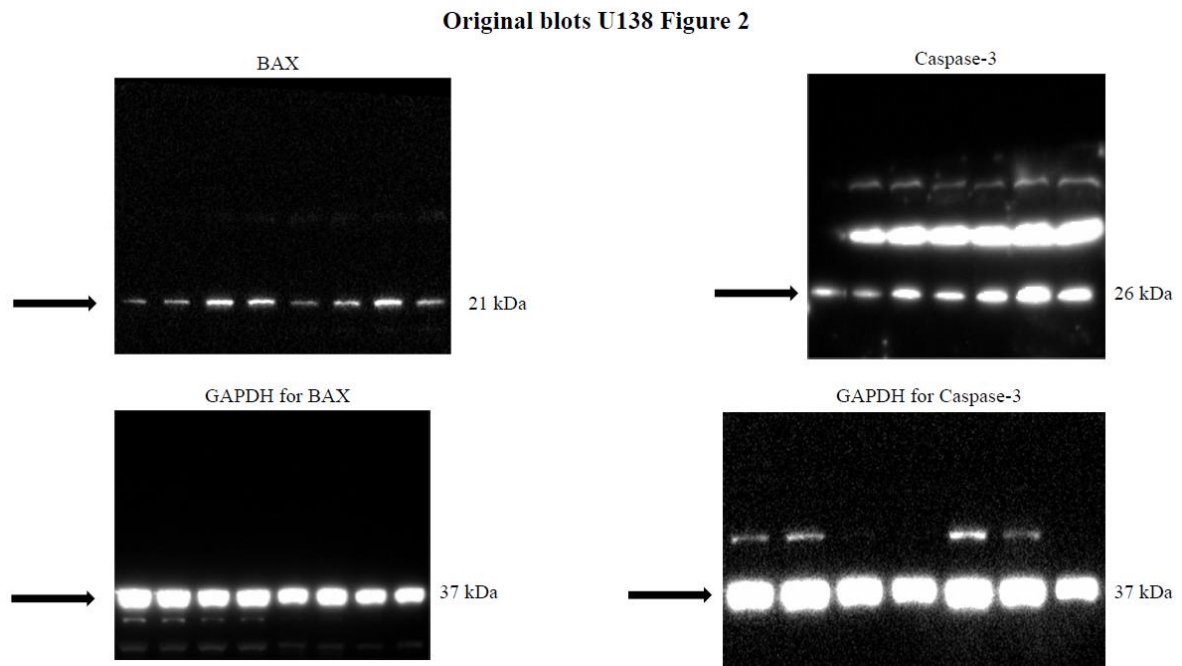

**Figure S2.** Original blots U138 of Figure 2.

Original blots Figure 4

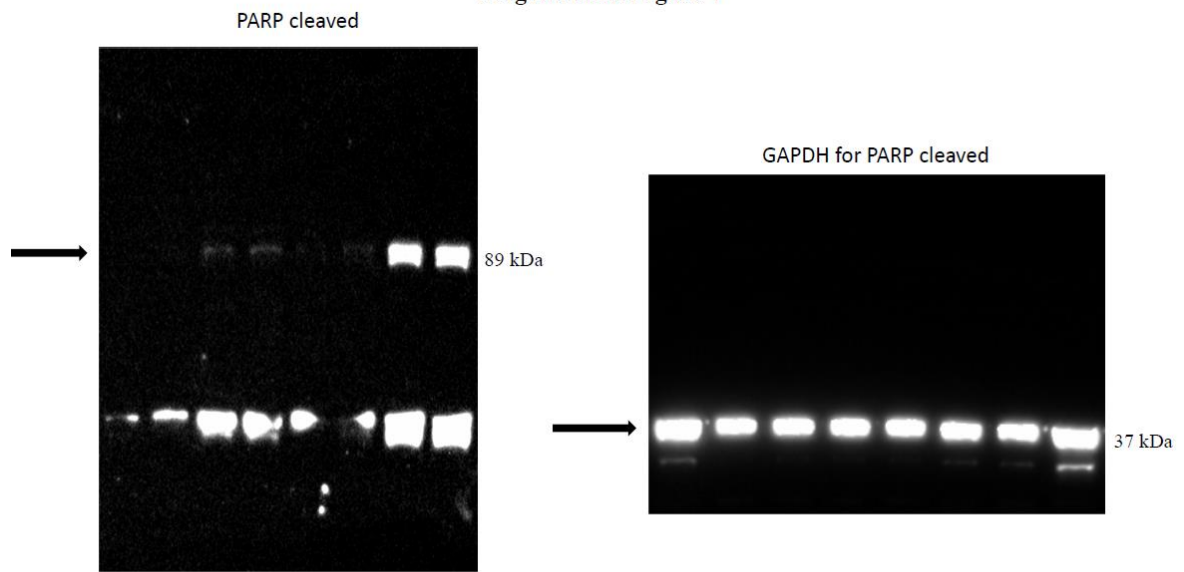

Figure S3. Original blots of Figure 4.

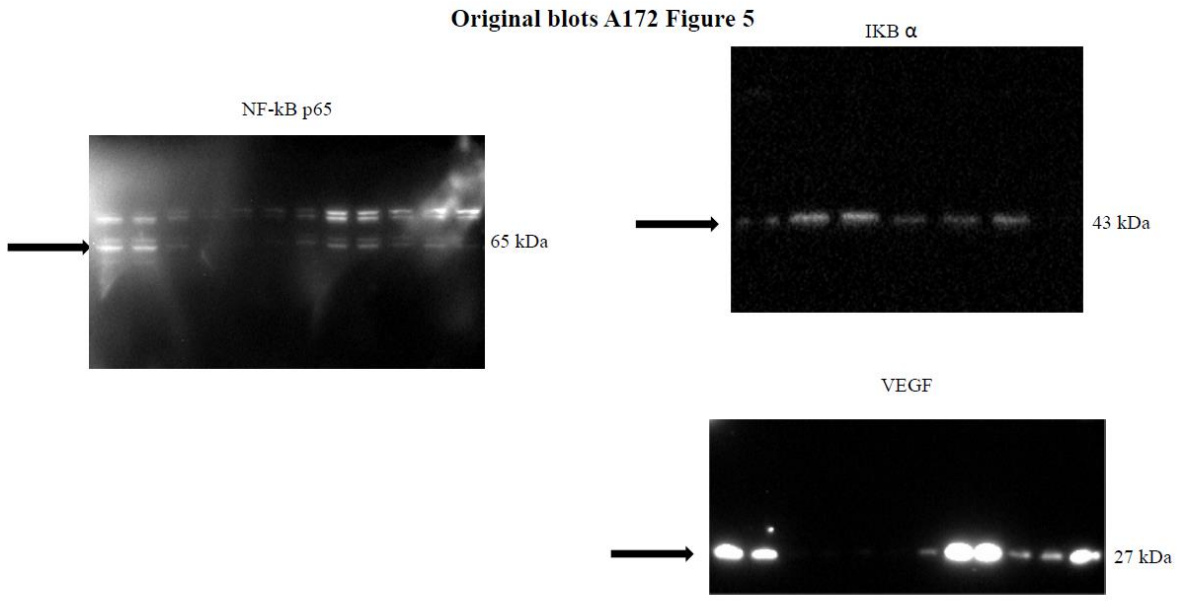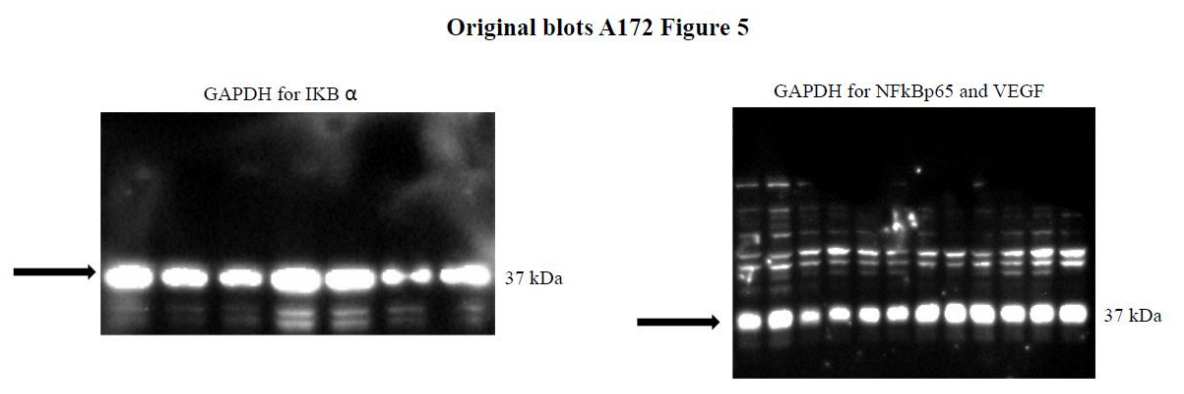

**Figure S4.** Original blots A172 of Figure 5.

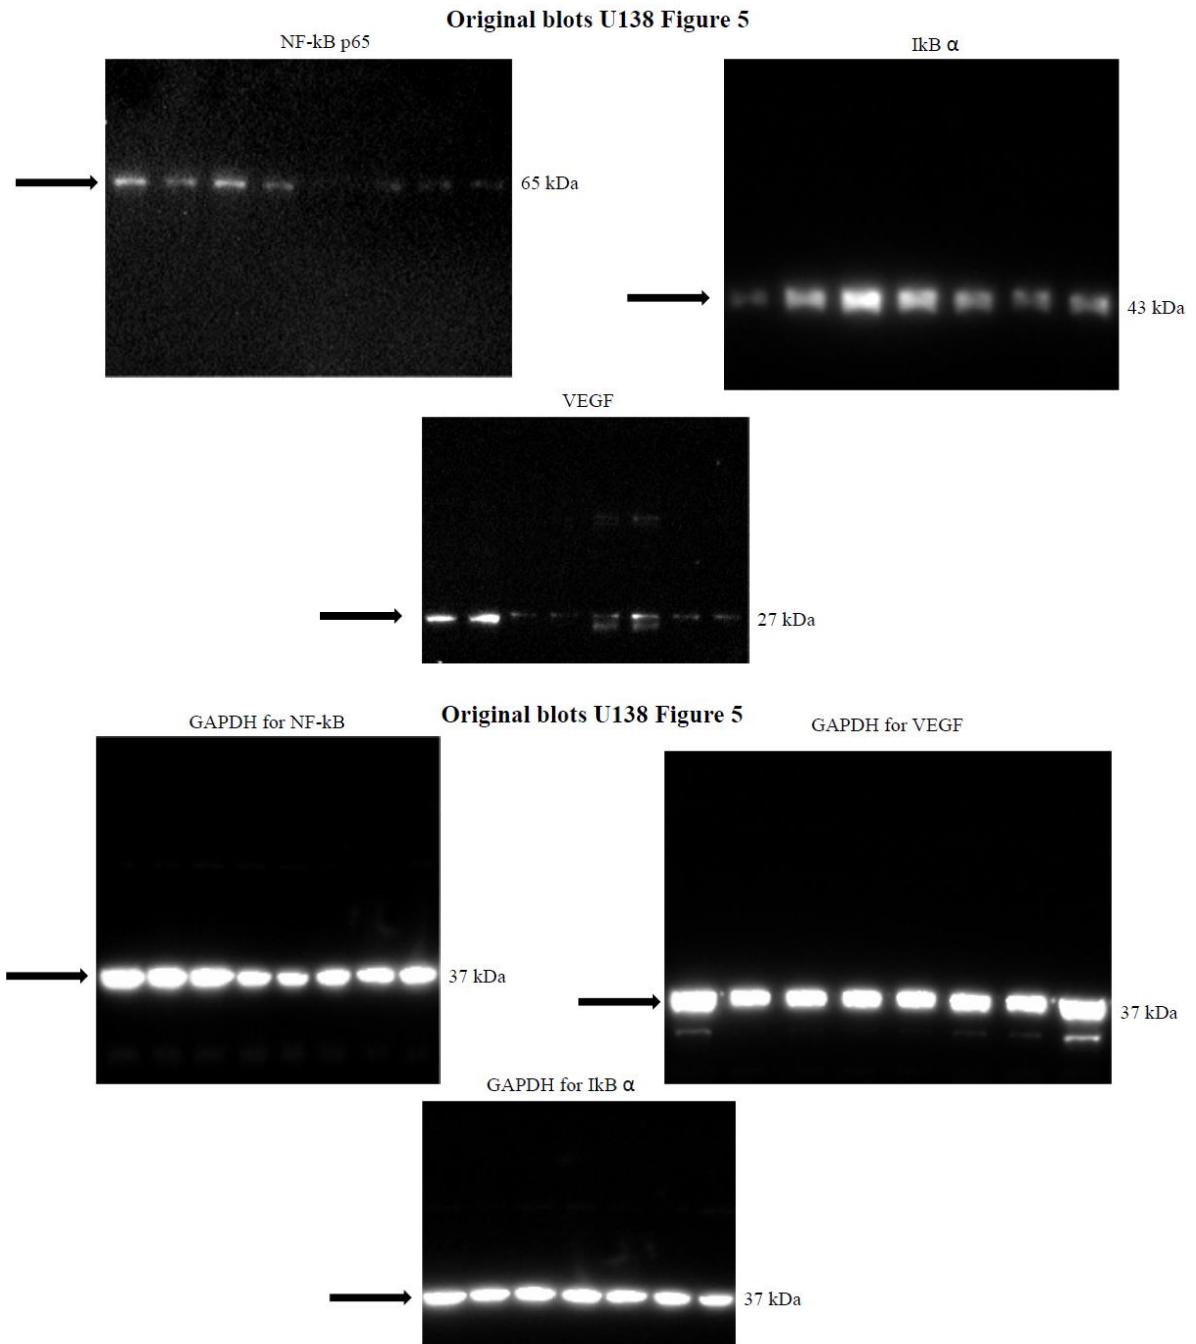

**Figure S5.** Original blots U138 of Figure 5.

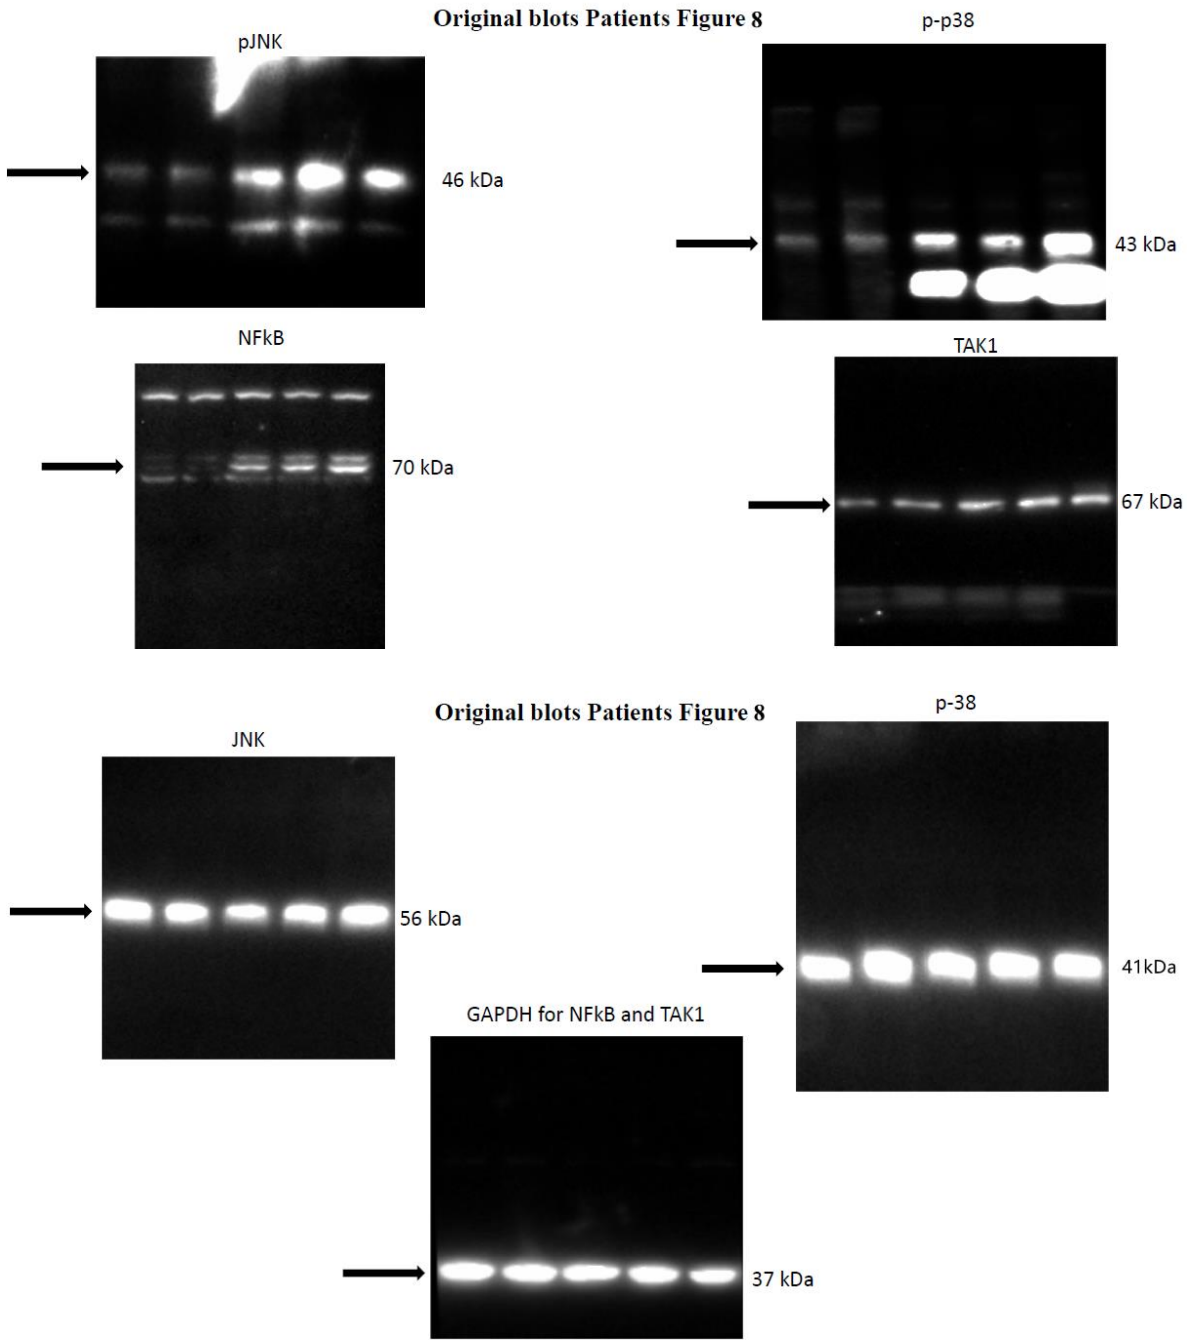

**Figure S6.** Original blots of Figure 8.
